# Supplementary material
Source: PubMed Central journal article supplement (PMC2816928)
Supplement: s-17-00119-sup1.pdf [file s-17-00119-sup1.pdf]

Supplementary Information for:

**" Development and exploration of a new methodology for the fitting and analysis of XAS data "**.

**Mario Ulises Delgado Jaime and Pierre Kennepohl\***

*The University of British Columbia, Department of Chemistry, 2036 Main Mall,  
Vancouver, BC V6T 1Z1, Canada. E-mail: pierre@chem.ubc.ca*

**Figure S1.** Evaluation function ( $f$ ) for the fitting of the long-range data set on the Cl K-edge XAS spectrum of  $(\text{NEt}_4)_2\text{CuCl}_4$ .

$$f_e = I_1(G_1 \cdot C_G + (1 - G_1) \cdot C_L)$$

$$C_G = \frac{1}{2} \left[ 1 + \operatorname{erf} \left( \frac{x - O_1}{W_1 / \ln 2} \right) \right]$$

$$C_L = \frac{1}{2} \arctan \left( \frac{x - O_1}{W_1} \right) + \frac{1}{\pi}$$

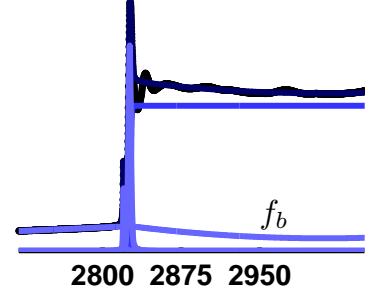

$$f_{p_1, p_2} = I_{2,3} \cdot I_1 * (G_{2,3} \cdot F_{G_{p_1, p_2}} + (1 - G_{2,3}) \cdot L_{p_1, p_2})$$

$$F_{G_{p_1, p_2}} = \sqrt{\frac{\ln 2}{W_{2,3}^2 \pi}} e^{-\frac{\ln 2 (x - O_{2,3})^2}{W_{2,3}^2}}$$

$$L_{p_1, p_2} = \frac{1}{\pi} \times \frac{W_{2,3}}{(x - O_{2,3})^2 + W_{2,3}^2}$$

$$f_b = f_1 \frac{1}{1 + e^{\frac{(x - O_1) \ln 3}{W_1}}} + f_2 \frac{1}{1 + e^{\frac{(O_1 - x) \ln 3}{W_1}}}$$

$$f_1 = m_1 \cdot x + YI$$

$$f_2 = p_1 \cdot (x - O_1)^2 + q_1 \cdot (x - O_1) + f_1(O_1)$$

$$f = f_e + f_{p_1} + f_{p_2} + f_b$$

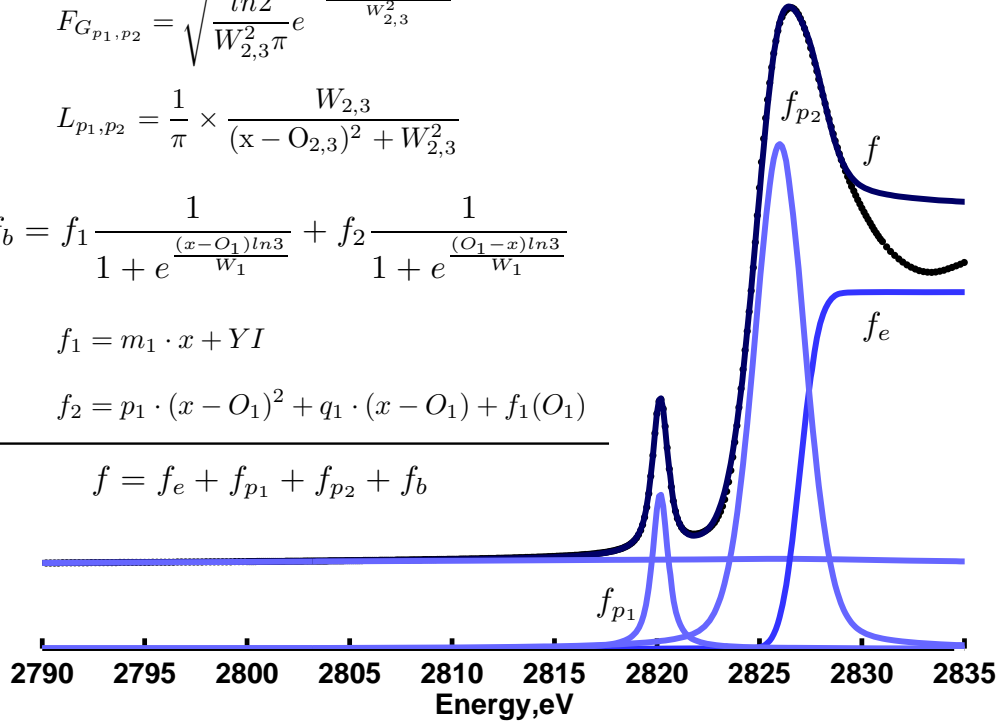

**Figure S2.** Evaluation function ( $f$ ) for the fitting of the Cl K-edge XAS data sets 1-14 of  $(\text{NEt}_4)_2\text{CuCl}_4$ .

$$f_e = I_1(G_1 \cdot C_G + (1 - G_1) \cdot C_L)$$

$$C_G = \frac{1}{2} \left[ 1 + \operatorname{erf} \left( \frac{x - O_1}{W_1 / \ln 2} \right) \right]$$

$$C_L = \frac{1}{2} \arctan \left( \frac{x - O_1}{W_1} \right) + \frac{1}{\pi}$$

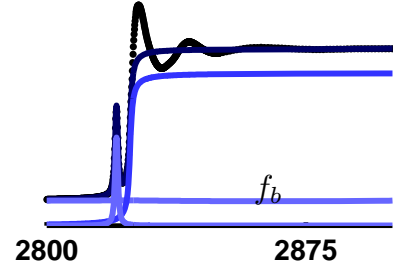

$$f_p = I_{2,3} \cdot I_1 * (G_{2,3} \cdot F_G + (1 - G_{2,3}) \cdot L)$$

$$F_G = \sqrt{\frac{\ln 2}{W_2^2 \pi}} e^{-\frac{\ln 2(x - O_2)^2}{W_2^2}}$$

$$L = \frac{1}{\pi} \times \frac{W_2}{(x - O_2)^2 + W_2^2}$$

$$f_b = f_1 \frac{1}{1 + e^{\frac{(x - O_1) \ln 3}{W_1}}} + f_2 \frac{1}{1 + e^{\frac{(O_1 - x) \ln 3}{W_1}}}$$

$$f_1 = m_1 \cdot x + YI$$

$$f_2 = p_1 \cdot (x - O_1)^2 + q_1 \cdot (x - O_1) + f_1(O_1)$$

$$f = f_e + f_m + f_b$$

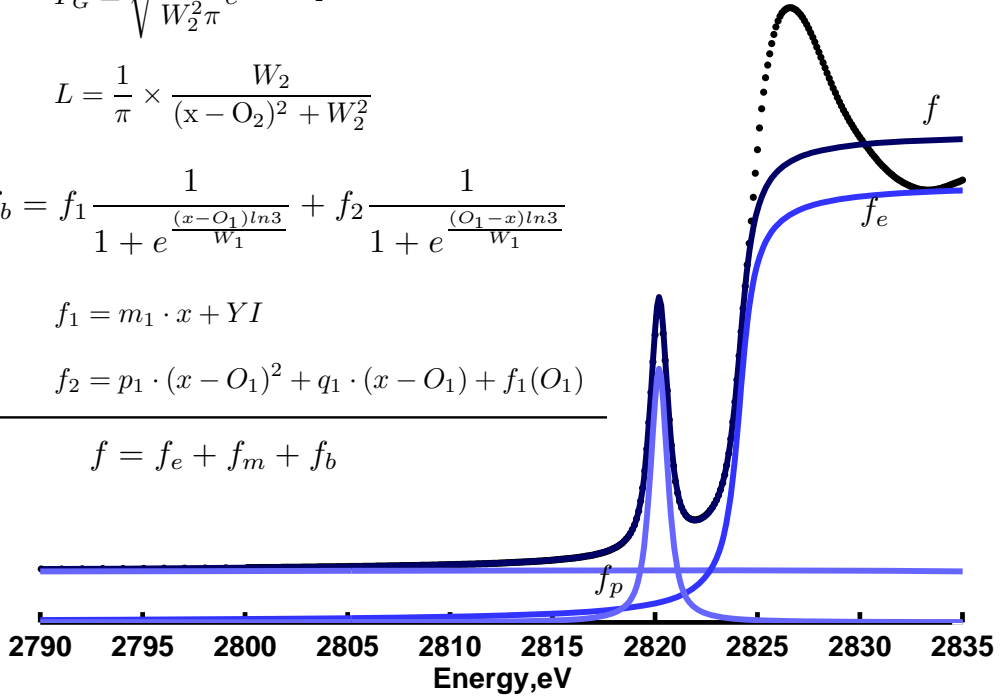

**Figure S3.** Excluded data (in gray) for the fitting of the Cl K-edge XAS data sets 1-14 of  $(\text{NEt}_4)_2\text{CuCl}_4$ .

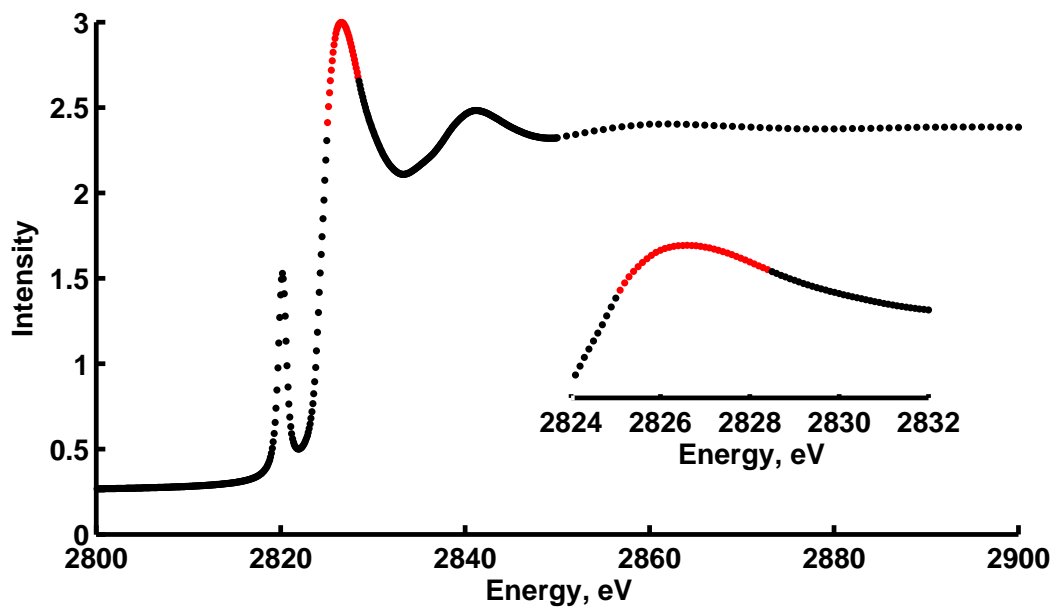

**Table S4.** Results for the pre-edge peak parameters from additional fit jobs on the Cl K-edge XAS data sets 1 and 3 of  $(\text{NEt}_4)_2\text{CuCl}_4$ .

| Sample #1<br>50 % BN | Normalised Intensity |       | Energy position, eV |       | Width, (hwhm, eV) |       | Shape, % Gaussian |       |
|----------------------|----------------------|-------|---------------------|-------|-------------------|-------|-------------------|-------|
|                      | Lower                | Upper | Lower               | Upper | Lower             | Upper | Lower             | Upper |
|                      | 0.2                  | 1.5   | 2820                | 2821  | 0.1               | 4     | 0                 | 1     |
| Fit Job              | Avg                  | Std   | Avg                 | Std   | Avg               | Std   | Avg               | Std   |
| 1                    | 0.846                | 0.007 | 2820.20             | <0.01 | 0.508             | 0.006 | 18.8              | 0.9   |
| 2                    | 0.842                | 0.021 | 2820.20             | <0.01 | 0.507             | 0.005 | 19.0              | 3.4   |
| 3                    | 0.844                | 0.005 | 2820.20             | <0.01 | 0.508             | 0.006 | 18.8              | 1.1   |
| 4                    | 0.845                | 0.007 | 2820.20             | <0.01 | 0.508             | 0.007 | 18.9              | 1.1   |
| Sample #3<br>50 % BN |                      |       |                     |       |                   |       |                   |       |
| Fit Job              | Avg                  | Std   | Avg                 | Std   | Avg               | Std   | Avg               | Std   |
| 1                    | 0.914                | 0.026 | 2820.20             | <0.01 | 0.535             | 0.003 | 20.1              | 0.3   |
| 2                    | 0.914                | 0.023 | 2820.20             | <0.01 | 0.535             | 0.003 | 20.0              | 0.2   |
| 3                    | 0.915                | 0.023 | 2820.20             | <0.01 | 0.535             | 0.003 | 20.1              | 0.4   |
| 4                    | 0.919                | 0.018 | 2820.20             | <0.01 | 0.535             | 0.003 | 20.0              | 0.4   |

**Figure S5.** Comparison between the pre-edge parameters from additional fit jobs on the Cl K-edge XAS data sets 1 and 3 of  $(\text{NEt}_4)_2\text{CuCl}_4$

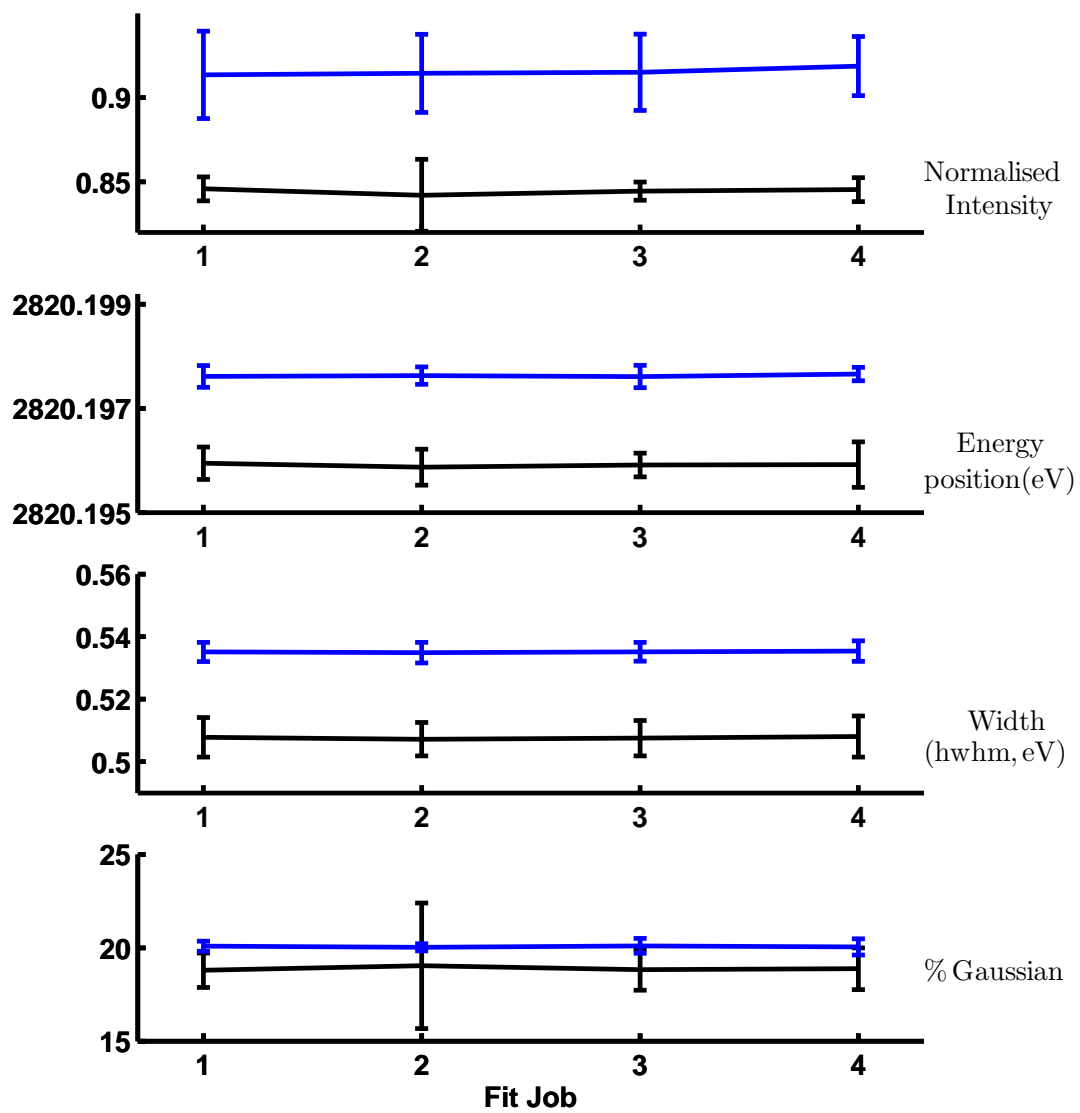

**Figure S6.** Variability of Background parameters  $m_1$ ,  $YI$ ,  $p_1$  and  $q_1$  in the Cl K-edge XAS data sets 1-14 of  $(\text{NEt}_4)_2\text{CuCl}_4$ .

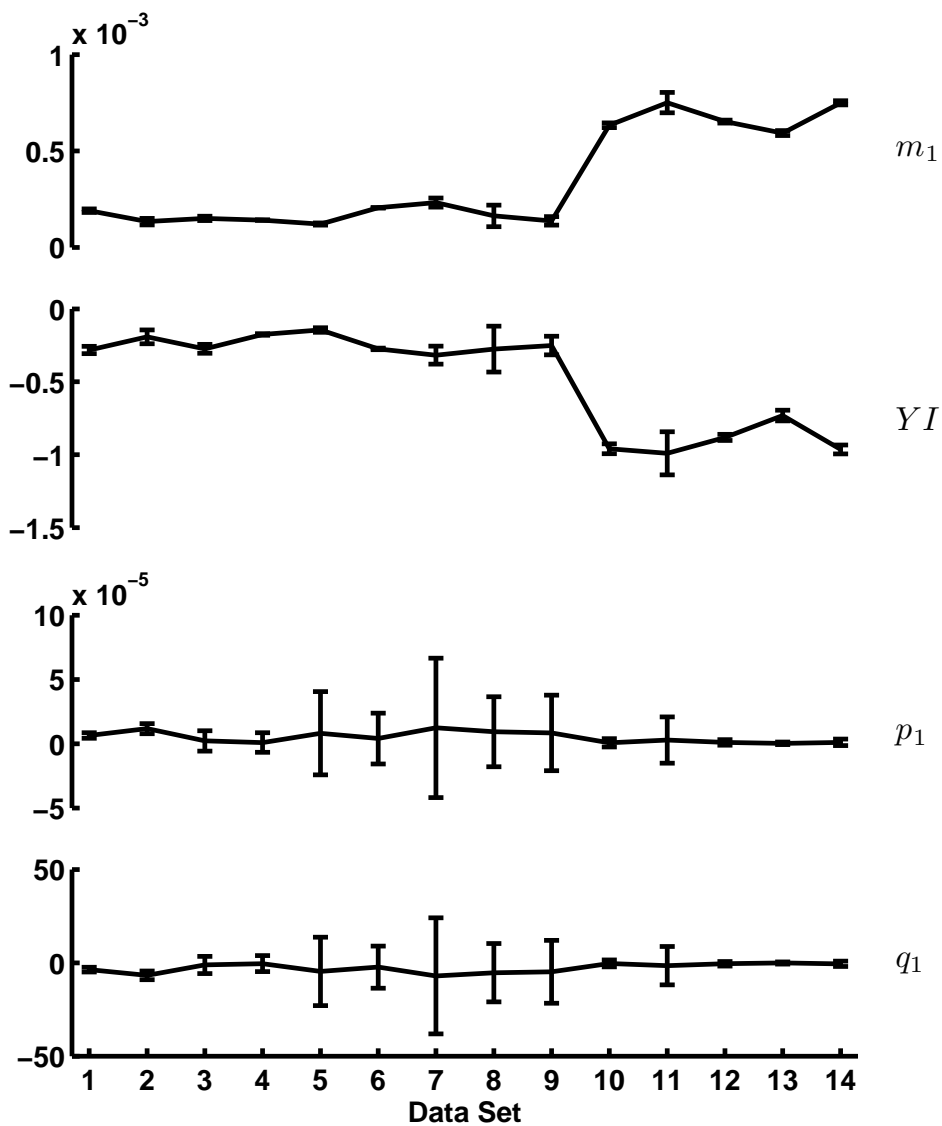

**Figure S7.** Initial evaluation function for the fitting of the Ru L<sub>2,3</sub>-edges XAS spectrum of compound **1**. The same Branching ratio  $B_1$  is used to correlate the intensity of the two edges, as well as the intensity of equivalent features in the peak functions  $f_{p1}$ - $f_{p3}$ .

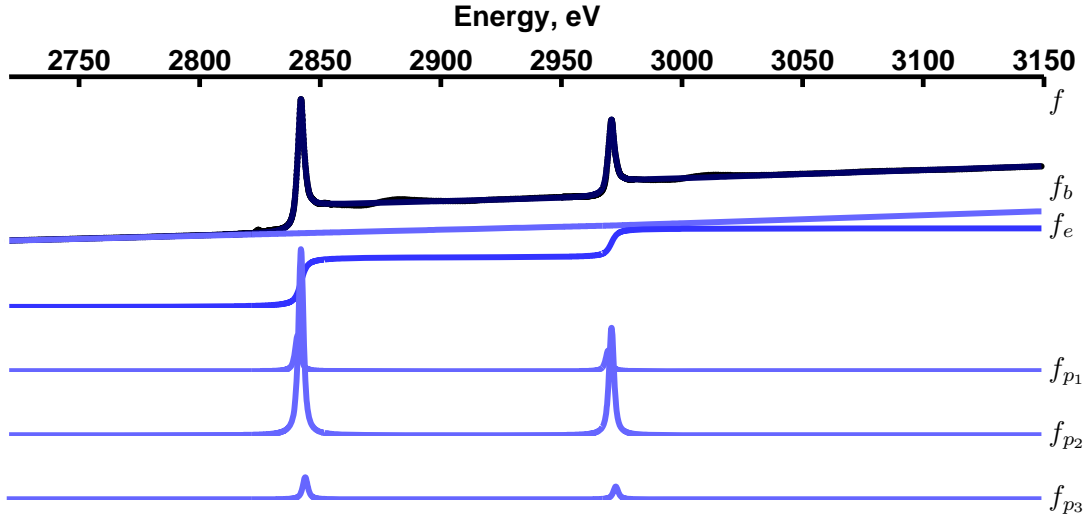

$$f_b = \frac{f_1}{1 + e^{(x-O_1)/W_1}} + \frac{f_2}{(1 + e^{(O_1-x)/W_1})(1 + e^{(x-O_2)/W_1})} + \frac{f_3}{1 + e^{(O_2-x)/W_1}}$$

$$f_1 = m_1 x + YI, \quad f_2 = m_2(x - O_1) + f_1(O_1), \quad f_3 = m_3(x - O_2) + f_2(O_2)$$

$$f_e = B_1 \cdot I_1 \left[ G_1 \cdot \frac{1}{2} \left[ 1 + \operatorname{erf} \left( \frac{x - O_1}{W_1 / \ln 2} \right) \right] + (1 - G_1) \cdot \left( \frac{1}{2} \arctan \left( \frac{x - O_1}{W_1} \right) + \frac{I}{\pi} \right) \right]$$

$$+ I_1 \left[ G_1 \cdot \frac{1}{2} \left[ 1 + \operatorname{erf} \left( \frac{x - O_2}{W_1 / \ln 2} \right) \right] + (1 - G_1) \cdot \left( \frac{1}{2} \arctan \left( \frac{x - O_2}{W_1} \right) + \frac{I}{\pi} \right) \right]$$

$$f_{p2} = B_1 \cdot I_2 \cdot I_1 \left[ G_2 \cdot \sqrt{\frac{\ln 2}{W_3^2 \pi}} e^{-\frac{\ln 2(x - O_4)^2}{W_3^2}} + \frac{(1 - G_2)}{\pi} \cdot \frac{W_3}{(x - O_4)^2 + W_3^2} \right]$$

$$+ I_2 \cdot I_1 \left[ G_2 \cdot \sqrt{\frac{\ln 2}{W_3^2 \pi}} e^{-\frac{\ln 2(x - O_5)^2}{W_3^2}} + \frac{(1 - G_2)}{\pi} \cdot \frac{W_3}{(x - O_5)^2 + W_3^2} \right]$$

$$f_{p1,p3} = B_1 \cdot B_{2,3} \cdot I_2 \cdot I_1 \left[ G_2 \cdot \sqrt{\frac{\ln 2}{W_3^2 \pi}} e^{-\frac{\ln 2(x - O_{6,7} - O_4)^2}{W_3^2}} + \frac{(1 - G_2)}{\pi} \cdot \frac{W_3}{(x - O_{6,7} - O_4)^2 + W_3^2} \right]$$

$$+ B_{2,3} \cdot I_2 \cdot I_1 \left[ G_2 \cdot \sqrt{\frac{\ln 2}{W_3^2 \pi}} e^{-\frac{\ln 2(x - O_{8,9} - O_5)^2}{W_3^2}} + \frac{(1 - G_2)}{\pi} \cdot \frac{W_3}{(x - O_{8,9} - O_5)^2 + W_3^2} \right]$$



**Figure S8.** Simplified evaluation function used in the fitting of the Ru L<sub>2,3</sub>-edges XAS spectrum of compound **1**. The splitting, due to the 2p spin-orbit coupling, denoted here as  $W_2$  is used to constrain, not only the inflection points of the two edges, but also the position of equivalent peaks in these two edges.

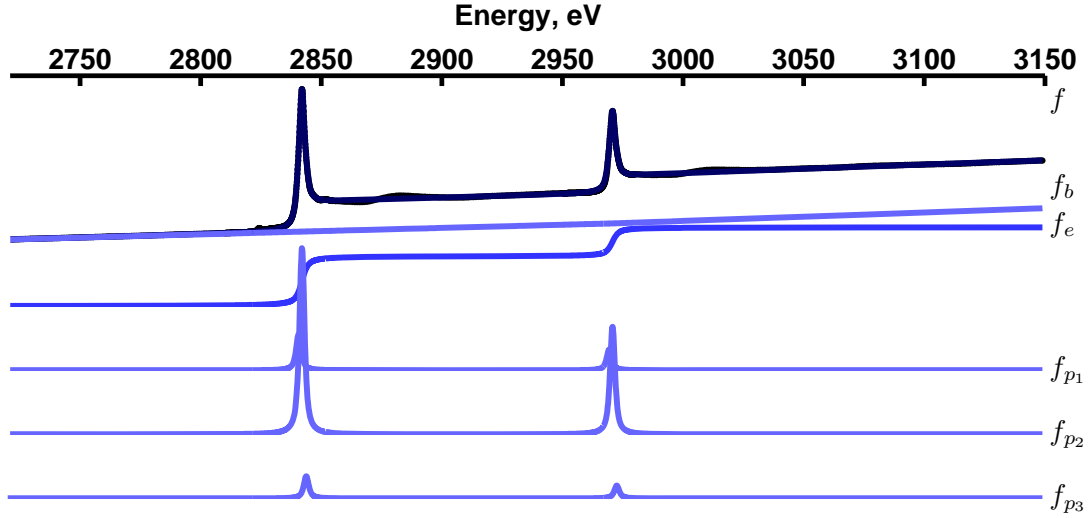

$$f_b = \frac{f_1}{1 + e^{(x-O_1)/W_1}} + \frac{f_2}{(1 + e^{(O_1-x)/W_1})(1 + e^{(x-O_1-W_2)/W_1})} + \frac{f_3}{1 + e^{(O_1+W_2-x)/W_1}}$$

$$f_1 = m_1x + YI, \quad f_2 = m_2(x - O_1) + f_1(O_1), \quad f_3 = m_3(x - O_1 - W_2) + f_2(O_1 + W_2)$$

$$f_e = B_1 \cdot I_1 \left[ G_1 \cdot \frac{1}{2} \left[ 1 + \operatorname{erf} \left( \frac{x - O_1}{W_1 / \ln 2} \right) \right] + (1 - G_1) \cdot \left( \frac{1}{2} \arctan \left( \frac{x - O_1}{W_1} \right) + \frac{1}{\pi} \right) \right]$$

$$+ I_1 \left[ G_1 \cdot \frac{1}{2} \left[ 1 + \operatorname{erf} \left( \frac{x - O_1 - W_2}{W_1 / \ln 2} \right) \right] + (1 - G_1) \cdot \left( \frac{1}{2} \arctan \left( \frac{x - O_1 - W_2}{W_1} \right) + \frac{1}{\pi} \right) \right]$$

$$f_{p2} = B_1 \cdot I_2 \cdot I_1 \left[ G_2 \cdot \sqrt{\frac{\ln 2}{W_3^2 \pi}} e^{-\frac{\ln 2(x - O_4)^2}{W_3^2}} + \frac{(1 - G_2)}{\pi} \cdot \frac{W_3}{(x - O_4)^2 + W_3^2} \right]$$

$$+ I_2 \cdot I_1 \left[ G_2 \cdot \sqrt{\frac{\ln 2}{W_3^2 \pi}} e^{-\frac{\ln 2(x - O_4 - W_2)^2}{W_3^2}} + \frac{(1 - G_2)}{\pi} \cdot \frac{W_3}{(x - O_4 - W_2)^2 + W_3^2} \right]$$

$$f_{p1,p3} = B_1 \cdot B_{2,3} \cdot I_2 \cdot I_1 \left[ G_2 \cdot \sqrt{\frac{\ln 2}{W_3^2 \pi}} e^{-\frac{\ln 2(x - O_{6,7} - O_4)^2}{W_3^2}} + \frac{(1 - G_2)}{\pi} \cdot \frac{W_3}{(x - O_{6,7} - O_4)^2 + W_3^2} \right]$$

$$+ B_{2,3} \cdot I_2 \cdot I_1 \left[ G_2 \cdot \sqrt{\frac{\ln 2}{W_3^2 \pi}} e^{-\frac{\ln 2(x - O_{6,7} - W_2 - O_4)^2}{W_3^2}} + \frac{(1 - G_2)}{\pi} \cdot \frac{W_3}{(x - O_{6,7} - W_2 - O_4)^2 + W_3^2} \right]$$
